# Supplementary material
Source: PubMed Central journal article supplement (PMC8603543)
Supplement: 12873_2021_536_MOESM1_ESM.pdf [file 12873_2021_536_MOESM1_ESM.pdf]

# Additional File 1

## Categorisation of Patient Presentations

|                           |                                                                                                                                                                |
|---------------------------|----------------------------------------------------------------------------------------------------------------------------------------------------------------|
| Seizure                   | Patients reporting seizure activity.                                                                                                                           |
| Fall                      | Falls (excluding falls from significant height)                                                                                                                |
| Medical                   | diabetic emergencies, confusion, lethargy, general decline, headaches, feeling generally unwell, dizziness, decreased mobility, poor oral intake and delirium. |
| Syncope                   | Including pre-syncopal symptoms                                                                                                                                |
| RTC                       | Patients involved in Road Traffic Collisions                                                                                                                   |
| Gastro                    | GI Bleeding, Vomiting & Diarrhoea                                                                                                                              |
| Drug / Alcohol Related    | Alcohol intoxication, recreational self-poisoning and accidental ingestions                                                                                    |
| Burns / Fire              | including Smoke inhalation                                                                                                                                     |
| Respiratory               | Exacerbations of COPD or Asthma, Lower Respiratory Tract infections excluding COVID-19                                                                         |
| Mental Health             | Anxiety, Depression, Psychosis and other mental health disorders                                                                                               |
| MSK                       | Musculoskeletal Disorders (excluding acute injuries) e.g. back pain, knee pain                                                                                 |
| ENT                       | Epistaxis, tonsillitis, sore throat and suspected upper respiratory tract infections                                                                           |
| Chest Pain / Palpitations | Atraumatic chest pain or palpitations.                                                                                                                         |
| MISC                      | Peg Tube replacement, ring removal request, trapped patient                                                                                                    |
| Urology                   | catheter problems, urinary tract infections, renal colic and haematuria                                                                                        |
| Wounds                    | Ulcers, pressure sores, bleeding varicose veins                                                                                                                |
| Surgical                  | Abdominal Pain, Vascular Presentations, Orthopaedic Issues (excluding acute injuries)                                                                          |
| Injuries: Wounds          | Wounds sustained from acute trauma.                                                                                                                            |
| Cardiac Arrest            | Cardiac Arrests including where resuscitation was not attempted.                                                                                               |
| Palliative                | Patients known to palliative care team at end stages of life                                                                                                   |
| Social                    | Medically fit patients suffering homelessness, Elderly home help issues, poor social circumstances                                                             |
| Allergy                   | Allergic Reactions                                                                                                                                             |
| Obs & Gynae               | PV Bleeding, Pregnancy related illnesses                                                                                                                       |
| Choking                   | Patients choking on food or other foreign body.                                                                                                                |
| Injuries: Fractures       | Acute fractures from trauma.                                                                                                                                   |
| Injuries: Head Injury     | Head Injuries from trauma.                                                                                                                                     |
| Injuries: Other           | Soft tissue injuries                                                                                                                                           |
| Injuries: Major Trauma    | Assault, Fall from height (e.g. ladder/roof)                                                                                                                   |
| Neurological              | New Focal neurological deficit, Ataxic.                                                                                                                        |
| Oncology                  | Symptoms related to known malignancy or treatment                                                                                                              |
| COVID-19: Related         | COVID-19 Positive, COVID-19 Suspected, COVID-19 Swabs                                                                                                          |
